# Supplementary material
Source: PubMed Central journal article supplement (PMC4350803)
Supplement: supp_the2014-0391_Supplemental_TableS1.pdf [file supp_the2014-0391_Supplemental_TableS1.pdf]

**Supplementary Table S1. TERT promoter & FGFR3 mutations detected in tumors from UBC patients**

| Patient number | TERT promoter mutation | Sex M / F | Age at diagnosis (year) | Tumor size (CM) | Diagnosis Pathology | Pathology grade | TNM stage | Metastasis | TERT mRNA | FGFR3 mutation |
|----------------|------------------------|-----------|-------------------------|-----------------|---------------------|-----------------|-----------|------------|-----------|----------------|
| BC-1           | 228T                   | M         | 70                      | 2               | LLIUC               | G2              | T1N0M0    | No         | 0.038     | WT             |
| BC-2           | 228T                   | M         | 64                      | 4               | HLIUC               | G3              | T1N0M0    | No         | 0.135     | WT             |
| BC-3           | 228T                   | M         | 60                      | 2               | HLIUC               | G3              | T1N0M0    | No         | 0.160     | WT             |
| BC-4           | 228T                   | M         | 71                      | 3.2             | HLIUC               | G3              | T1N0M0    | No         | NA        | WT             |
| BC-5           | 228T                   | M         | 55                      | 8.1             | LLIUC               | G2              | T1N0M0    | No         | 0.156     | WT             |
| BC-6           | 228T                   | M         | 74                      | 3.8             | LLNIUC              | G2              | T1N0M0    | No         | 0.029     | NA             |
| BC-7           | 228T                   | M         | 56                      | 3.7             | HLIUC               | G3              | T1N0M0    | No         | 0.053     | NA             |
| BC-8           | 228T                   | M         | 57                      | 2.1             | HLIUC               | G3              | T1N0M0    | No         | NA        | WT             |
| BC-9           | 228T                   | M         | 73                      | 1.5             | HLNIUC              | G3              | T1N0M0    | No         | 0.022     | NA             |
| BC-10          | 228T                   | M         | 69                      | 4               | LLIUC               | G2              | T2bN0M0   | No         | 0.368     | WT             |
| BC-11          | 228T                   | M         | 68                      | 3               | HLIUC               | G3              | T2bN0M0   | No         | 0.155     | WT             |
| BC-12          | 228T                   | F         | 65                      | 2               | HLIUC               | G3              | T3aN0M0   | No         | NA        | NA             |
| BC-13          | 228T                   | M         | 51                      | 2.7             | HLIUC               | G3              | T3bN2M0   | LNLM       | 0.037     | WT             |
| BC-14          | 228T                   | M         | 75                      | 1.5             | LLNIUC              | G2              | TaN0M0    | No         | 0.015     | WT             |
| BC-15          | 228T                   | M         | 66                      | 5               | HLIUC               | G3              | TaN0M0    | No         | NA        | WT             |
| BC-16          | 228T                   | M         | 70                      | 3               | HLIUC               | G3              | TaN0M0    | No         | NA        | WT             |
| BC-17          | 228T                   | M         | 79                      | 1.5             | LLIUC               | G2              | TaN0M0    | No         | NA        | NA             |
| BC-18          | 228T                   | F         | 60                      | 1.9             | LLNIUC              | G2              | TaN0M0    | No         | 0.092     | NA             |
| BC-19          | 228T                   | F         | 70                      | 3               | LLNIUC              | G2              | TaN0M0    | No         | 0.004     | WT             |
| BC-20          | 228T                   | M         | 59                      | 7               | HLIUC               | G3              | T3aN0M0   | No         | 11.897    | WT             |
| BC-21          | 228T                   | F         | 70                      | 3.3             | PDA                 | PDA             | T3aN0M0   | No         | NA        | NA             |
| BC-22          | 228T                   | M         | 82                      | 1.5             | HLNIUC              | G3              | TaN0M0    | No         | NA        | NA             |
| BC-23          | 228T                   | M         | 64                      | 0.5             | LLNIUC              | G2              | TaN0M0    | No         | 0.006     | WT             |
| BC-24          | 228T                   | M         | 44                      | 1               | LMPNUC              | G1              | TaN0M0    | No         | NA        | WT             |
| BC-25          | 228T                   | M         | 59                      | NA              | TIS                 | G1              | TisN0M0   | No         | NA        | WT             |
| BC-26          | 228T                   | M         | 89                      | NA              | LLIUC               | G2              | T1N0M0    | No         | NA        | NA             |
| BC-27          | 228T                   | M         | 63                      | NA              | HLIUC               | G3              | T1N0M0    | No         | NA        | NA             |
| BC-28          | 228T                   | M         | 71                      | 2.5             | HLIUC               | G3              | T1N0M0    | No         | 0.046     | WT             |
| BC-29          | 228T                   | M         | 71                      | 1.5             | HLNIUC              | G3              | T1N0M0    | No         | 0.068     | S249C/G372C    |
| BC-30          | 228T                   | M         | 53                      | 7               | HLIUC               | G3              | T2aN0M0   | No         | 0.038     | WT             |
| BC-31          | 228T                   | M         | 59                      | 5               | HLIUC               | G3              | T3aN0M0   | No         | 0.039     | WT             |
| BC-32          | 228T                   | M         | 47                      | 2.5             | LLIUC               | G2              | TaN0M0    | No         | NA        | NA             |
| BC-33          | 228T                   | M         | 78                      | 3               | LMPUC               | G1              | TaN0M0    | No         | NA        | WT             |
| BC-34          | 228T                   | M         | 63                      | 2               | LLIUC               | G2              | TaN0M0    | No         | NA        | WT             |
| BC-35          | 228T                   | M         | 60                      | 2.7             | LLNIUC              | G2              | TaN0M0    | No         | 0.270     | WT             |
| BC-36          | 228T                   | M         | 55                      | 2.2             | LLIUC               | G2              | TaN0M0    | No         | NA        | NA             |
| BC-37          | 228T                   | M         | 59                      | 3.5             | HLIUC               | G3              | T2aN0M0   | No         | NA        | WT             |
| BC-38          | 228T                   | M         | 64                      | 9               | HLIUC               | G3              | T3aN0M0   | No         | NA        | NA             |
| BC-39          | 228T                   | M         | 64                      | 7               | HLIUC               | G3              | T4aN1M0   | LNLM       | NA        | NA             |
| BC-40          | 228T                   | M         | 45                      | 2.7             | LLIUC               | G2              | TaN0M0    | No         | NA        | NA             |
| BC-41          | 228T                   | M         | 83                      | 4               | HLIUC               | G3              | T1N0M0    | No         | NA        | NA             |
| BC-42          | 228T                   | M         | 79                      | 5.6             | HLIUC               | G3              | T3aN0M0   | No         | NA        | NA             |
| BC-43          | 228T                   | M         | 57                      | 2               | LLIUC               | G2              | TaN0M0    | No         | 0.051     | WT             |
| BC-44          | 228T                   | M         | 79                      | 1.2             | HLIUC               | G3              | T1N0M0    | No         | NA        | NA             |
| BC-45          | 228T                   | M         | 68                      | 2               | HLIUC               | G3              | T1N0M0    | No         | NA        | NA             |
| BC-46          | 228T                   | M         | 50                      | 7.5             | LLIUC               | G2              | T1N0M0    | No         | NA        | NA             |
| BC-47          | 228T                   | M         | 66                      | 3.5             | HLIUC               | G3              | T1N0M0    | No         | NA        | NA             |

|       |      |   |    |     |        |    |         |     |       |       |
|-------|------|---|----|-----|--------|----|---------|-----|-------|-------|
| BC-48 | 228T | F | 69 | 1.1 | HLIUC  | G3 | T1N0M0  | No  | NA    | WT    |
| BC-49 | 228T | M | 65 | 4   | HLIUC  | G3 | T1N0M0  | No  | NA    | NA    |
| BC-50 | 228T | M | 67 | 4   | HLIUC  | G3 | T1N0M0  | No  | NA    | WT    |
| BC-51 | 228T | M | 68 | 2   | HLIUC  | G3 | T1N0M0  | No  | NA    | NA    |
| BC-52 | 228T | M | 64 | 4   | HLIUC  | G3 | T2aN0M0 | No  | NA    | NA    |
| BC-53 | 228T | F | 62 | 6   | HLIUC  | G3 | T2bN0M0 | No  | NA    | WT    |
| BC-54 | 228T | M | 49 | 5   | HLIUC  | G3 | T2bN0M0 | No  | NA    | NA    |
| BC-55 | 228T | F | 62 | 3   | HLIUC  | G3 | T2bN0M0 | No  | NA    | WT    |
| BC-56 | 228T | M | 73 | 2.5 | HLIUC  | G3 | T2N0M0  | No  | NA    | WT    |
| BC-57 | 228T | M | 64 | 6   | HLIUC  | G3 | T4aN0M0 | No  | NA    | NA    |
| BC-58 | 228T | F | 68 | 2.6 | LLIUC  | G2 | TaN0M0  | No  | NA    | WT    |
| BC-59 | 228T | M | 55 | 2.4 | LLIUC  | G2 | TaN0M0  | No  | NA    | NA    |
| BC-60 | 228T | F | 70 | 3   | LLIUC  | G2 | TaN0M0  | No  | NA    | WT    |
| BC-61 | 228T | M | 70 | 2   | LLIUC  | G2 | TaN0M0  | No  | NA    | NA    |
| BC-62 | 228T | M | 56 | 2   | HLIUC  | G3 | TaN0M0  | No  | NA    | NA    |
| BC-63 | 228T | M | 55 | 2   | HLIUC  | G3 | TaN0M0  | No  | NA    | NA    |
| BC-64 | 228T | M | 39 | NA  | LLIUC  | G2 | TaN0M0  | No  | NA    | WT    |
| BC-65 | 228T | M | 75 | 2.8 | LMPUC  | G1 | TaN0M0  | No  | NA    | NA    |
| BC-66 | 228T | M | 75 | 2.6 | HLIUC  | G3 | TaN0M0  | No  | NA    | WT    |
| BC-67 | 228T | M | 71 | 2.5 | HLIUC  | G3 | TaN0M0  | No  | NA    | WT    |
| BC-68 | 228T | M | 73 | 2.3 | LLIUC  | G2 | TaN0M0  | No  | NA    | WT    |
| BC-69 | 228T | M | 70 | 2.1 | LLIUC  | G2 | TaN0M0  | No  | NA    | WT    |
| BC-70 | 228T | F | 66 | 1.5 | LLIUC  | G2 | TaN0M0  | No  | NA    | WT    |
| BC-71 | 228T | M | 56 | 1.5 | LLIUC  | G2 | TaN0M0  | No  | NA    | WT    |
| BC-72 | 228T | M | 74 | 4   | LLIUC  | G2 | TaN0M0  | No  | NA    | WT    |
| BC-73 | 228T | M | 54 | 3   | LLIUC  | G2 | TaN0M0  | No  | NA    | NA    |
| BC-74 | 228T | M | 66 | 2   | LLIUC  | G2 | TaN0M0  | No  | NA    | NA    |
| BC-75 | 228T | M | 66 | 2   | LLIUC  | G2 | TaN0M0  | No  | NA    | WT    |
| BC-76 | 228T | M | 59 | NA  | HLIUC  | G3 | TaN0M0  | No  | NA    | WT    |
| BC-77 | 228T | M | 80 | NA  | LLIUC  | G2 | TaN0M0  | No  | NA    | WT    |
| BC-78 | 250T | M | 58 | 4   | HLIUC  | G3 | T3aN0M0 | No  | 0.131 | WT    |
| BC-79 | 250T | M | 41 | 2.3 | HLIUC  | G3 | T4aN0M0 | No  | NA    | G272C |
| BC-80 | 250T | M | 65 | 1   | HLNIUC | G3 | T1N0M0  | No  | 0.045 | WT    |
| BC-81 | 250T | M | 52 | 4.8 | LLIUC  | G2 | T1N0M0  | No  | NA    | NA    |
| BC-82 | 250T | M | 73 | 0.8 | LLIUC  | G2 | TaN0M0  | No  | 0.036 | WT    |
| BC-83 | 250T | M | 62 | 1.9 | LLIUC  | G2 | TaN0M0  | No  | NA    | NA    |
| BC-84 | 250T | M | 53 | 2.3 | HLIUC  | G3 | TaN0M0  | No  | NA    | WT    |
| BC-85 | 250T | M | 66 | 1.4 | LLIUC  | G2 | TaN0M0  | No  | NA    | WT    |
| BC-86 | 228A | M | 50 | 3   | LLNIUC | G2 | TaN0M0  | No  | 0.008 | WT    |
| BC-87 | 242T | M | 47 | 4   | LLNIUC | G2 | T1N0M0  | No  | Neg   | WT    |
| BC-88 | WT   | M | 68 | 7.3 | LLIUC  | G2 | T1N0M0  | No  | NA    | WT    |
| BC-89 | WT   | M | 51 | 2.6 | LMPNUC | G1 | TaN0M0  | No  | Neg   | G272C |
| BC-90 | WT   | M | 79 | 2.1 | HLIUC  | G3 | T1N0M0  | No  | NA    | WT    |
| BC-91 | WT   | M | 73 | 0.5 | LMPNUC | G1 | TaN0M0  | No  | NA    | NA    |
| BC-92 | WT   | M | 60 | 2.3 | TIS    | G1 | TisN0M0 | No  | NA    | NA    |
| BC-93 | WT   | M | 53 | NA  | LLIUC  | G2 | T1N0M0  | No  | Neg   | WT    |
| BC-94 | WT   | M | 79 | 5   | HLIUC  | G3 | T4aN1M0 | LNm | NA    | WT    |
| BC-95 | WT   | M | 61 | 3   | LMPUC  | G1 | TaN0M0  | No  | NA    | NA    |
| BC-96 | WT   | M | 61 | 3   | LLIUC  | G2 | TaN0M0  | No  | 0.043 | NA    |
| BC-97 | WT   | M | 63 | 2.8 | HLIUC  | G3 | TaN0M0  | No  | NA    | WT    |
| BC-98 | WT   | F | 79 | 1   | LLNIUC | G2 | TaN0M0  | No  | NA    | WT    |

|        |    |   |    |     |        |     |         |      |       |       |
|--------|----|---|----|-----|--------|-----|---------|------|-------|-------|
| BC-99  | WT | M | 71 | NA  | HLIUC  | G3  | T1N0M0  | No   | 0.021 | WT    |
| BC-100 | WT | M | 66 | 4.3 | LLIUC  | G2  | T1N0M0  | No   | NA    | NA    |
| BC-101 | WT | M | 61 | 3.4 | HLIUC  | G3  | T1N0M0  | No   | NA    | NA    |
| BC-102 | WT | M | 57 | 2.8 | HLNIUC | G3  | T1N0M0  | No   | 0.261 | WT    |
| BC-103 | WT | F | 43 | 4   | HLIUC  | G3  | T1N0M0  | No   | 0.108 | G272C |
| BC-104 | WT | M | 79 | 3   | HLIUC  | G3  | T1N0M0  | No   | NA    | NA    |
| BC-105 | WT | M | 61 | 1   | LLIUC  | G2  | T1N0M0  | No   | NA    | WT    |
| BC-106 | WT | M | 62 | 8.1 | HLIUC  | G3  | T1N0M0  | No   | NA    | NA    |
| BC-107 | WT | M | 81 | 1.5 | LLIUC  | G2  | T1N0M0  | No   | NA    | NA    |
| BC-108 | WT | M | 73 | 4   | LLIUC  | G2  | T1N0M0  | No   | 0.786 | WT    |
| BC-109 | WT | F | 70 | 3   | HLIUC  | G3  | T1N0M0  | No   | NA    | WT    |
| BC-110 | WT | M | 70 | 3   | HLNIUC | G3  | T1N0M0  | No   | Neg   | NA    |
| BC-111 | WT | F | 72 | 5.5 | LLIUC  | G2  | T1N0M0  | No   | NA    | NA    |
| BC-112 | WT | M | 70 | 4   | HLIUC  | G3  | T1N0M0  | No   | NA    | WT    |
| BC-113 | WT | M | 69 | 3.6 | HLIUC  | G3  | T2aN0M0 | No   | 0.016 | NA    |
| BC-114 | WT | M | 74 | 4   | HLIUC  | G3  | T2bN0M0 | No   | NA    | NA    |
| BC-115 | WT | F | 75 | 5   | HLIUC  | G3  | T2bN0M0 | No   | NA    | NA    |
| BC-116 | WT | F | 57 | 2   | MDA    | MDA | T2bN0M0 | No   | NA    | NA    |
| BC-117 | WT | F | 70 | 8   | HLIUC  | G3  | T3aN0M0 | No   | 0.514 | WT    |
| BC-118 | WT | M | 66 | 6   | LLIUC  | G2  | T3aN0M0 | No   | NA    | WT    |
| BC-119 | WT | F | 54 | 4   | HLIUC  | G3  | T3aN2M0 | LNLM | 0.547 | R248C |
| BC-120 | WT | M | 60 | 8.2 | HLIUC  | G3  | T3bN0M0 | No   | 0.061 | WT    |
| BC-121 | WT | M | 63 | 11  | LLIUC  | G2  | T4aN0M0 | No   | NA    | NA    |
| BC-122 | WT | M | 65 | NA  | HLIUC  | G3  | T4N0M0  | No   | 0.046 | Y375C |
| BC-123 | WT | M | 76 | NA  | HLIUC  | G3  | TaN0M0  | No   | NA    | NA    |
| BC-124 | WT | M | 50 | 0.8 | LMPUC  | G1  | TaN0M0  | No   | NA    | WT    |
| BC-125 | WT | M | 66 | 2   | HLNIUC | G3  | TaN0M0  | No   | 0.012 | WT    |
| BC-126 | WT | M | 82 | 2.5 | LLIUC  | G2  | TaN0M0  | No   | NA    | WT    |
| BC-127 | WT | F | 56 | 2.3 | LMPUC  | G1  | TaN0M0  | No   | NA    | NA    |
| BC-128 | WT | M | 74 | 1.5 | LLIUC  | G2  | TaN0M0  | No   | NA    | R248C |
| BC-129 | WT | M | 86 | 1.5 | LMPUC  | G1  | TaN0M0  | No   | NA    | NA    |
| BC-130 | WT | M | 75 | 1.2 | LMPUC  | G1  | TaN0M0  | No   | NA    | NA    |
| BC-131 | WT | M | 44 | 0.8 | LMPUC  | G1  | TaN0M0  | No   | NA    | NA    |
| BC-132 | WT | M | 46 | 4   | LLIUC  | G2  | TaN0M0  | No   | NA    | WT    |
| BC-133 | WT | M | 62 | 3   | LLIUC  | G2  | TaN0M0  | No   | NA    | NA    |
| BC-134 | WT | M | 87 | 3   | HLIUC  | G3  | TaN0M0  | No   | NA    | WT    |
| BC-135 | WT | F | 78 | 6.5 | HLIUC  | G3  | TaN0M0  | No   | 0.046 | WT    |
| BC-136 | WT | M | 48 | 4.1 | LMPNUC | G1  | TaN0M0  | No   | Neg   | WT    |
| BC-137 | WT | F | 83 | 3.1 | LLNIUC | G2  | TaN0M0  | No   | 0.061 | WT    |
| BC-138 | WT | M | 73 | 2   | LLNIUC | G2  | TaN0M0  | No   | NA    | WT    |
| BC-139 | WT | M | 60 | 2   | HLNIUC | G3  | TaN0M0  | No   | NA    | WT    |
| BC-140 | WT | M | 75 | 1   | LMPNUC | G1  | TaN0M0  | No   | NA    | NA    |
| BC-141 | WT | M | 48 | 3.2 | LLNIUC | G2  | TaN0M0  | No   | NA    | WT    |
| BC-142 | WT | M | 67 | 2.1 | HLNIUC | G3  | TaN0M0  | No   | NA    | WT    |
| BC-143 | WT | M | 60 | 1.5 | HLNIUC | G3  | TaN0M0  | No   | NA    | WT    |
| BC-144 | WT | M | 73 | NA  | HLIUC  | G3  | T1N0M0  | No   | NA    | NA    |
| BC-145 | WT | M | 60 | 2   | HLIUC  | G3  | T1N0M0  | No   | NA    | WT    |
| BC-146 | WT | M | 54 | 2.0 | LMPUC  | G1  | TaN0M0  | No   | NA    | WT    |
| BC-147 | WT | M | 36 | 5.1 | LLIUC  | G2  | T1N0M0  | No   | NA    | NA    |
| BC-148 | WT | F | 84 | 2.5 | HLIUC  | G3  | T1N0M0  | No   | NA    | NA    |
| BC-149 | WT | M | 57 | 5   | HLIUC  | G3  | T1N0M0  | No   | NA    | NA    |

|        |    |   |    |     |       |    |         |     |    |    |
|--------|----|---|----|-----|-------|----|---------|-----|----|----|
| BC-150 | WT | F | 78 | 4   | HLIUC | G3 | T1N0M0  | No  | NA | NA |
| BC-151 | WT | F | 78 | 3   | HLIUC | G3 | T1N0M0  | No  | NA | NA |
| BC-152 | WT | M | 66 | 3   | HLIUC | G3 | T1N0M0  | No  | NA | NA |
| BC-153 | WT | M | 59 | 3.6 | HLIUC | G3 | T2aN0M0 | No  | NA | NA |
| BC-154 | WT | M | 63 | 5.3 | HLIUC | G3 | T2aN2M0 | LNM | NA | NA |
| BC-155 | WT | M | 73 | 5   | HLIUC | G3 | T3aN0M0 | No  | NA | NA |
| BC-156 | WT | M | 71 | 5.2 | HLIUC | G3 | T3aN0M0 | No  | NA | NA |
| BC-157 | WT | F | 21 | 4.2 | LLIUC | G2 | T3aN1M0 | LNM | NA | WT |
| BC-158 | WT | M | 66 | 6.7 | HLIUC | G3 | T3aN2M0 | LNM | NA | WT |
| BC-159 | WT | F | 34 | 4   | HLIUC | G3 | T3aN2M0 | LNM | NA | WT |
| BC-160 | WT | M | 63 | 4.7 | HLIUC | G3 | T4aN0M0 | No  | NA | NA |
| BC-161 | WT | M | 43 | 3   | HLIUC | G3 | T4aN0M0 | No  | NA | WT |
| BC-162 | WT | M | 64 | 3   | HLIUC | G3 | T4aN2M0 | LNM | NA | NA |
| BC-163 | WT | M | 57 | 2.5 | LLIUC | G2 | TaN0M0  | No  | NA | NA |
| BC-164 | WT | M | 65 | 3   | LLIUC | G2 | TaN0M0  | No  | NA | NA |
| BC-165 | WT | M | 75 | 3   | LLIUC | G2 | TaN0M0  | No  | NA | WT |
| BC-166 | WT | M | 64 | 3   | HLIUC | G3 | TaN0M0  | No  | NA | WT |
| BC-167 | WT | F | 58 | 2   | LLIUC | G2 | TaN0M0  | No  | NA | NA |
| BC-168 | WT | F | 79 | 1   | LLIUC | G2 | TaN0M0  | No  | NA | WT |
| BC-169 | WT | M | 85 | 1   | LLIUC | G2 | TaN0M0  | No  | NA | NA |
| BC-170 | WT | M | 51 | NA  | LLIUC | G2 | TaN0M0  | No  | NA | WT |
| BC-171 | WT | M | 71 | 5.5 | HLIUC | G3 | TaN0M0  | No  | NA | WT |
| BC-172 | WT | M | 66 | 2.6 | LLIUC | G2 | TaN0M0  | No  | NA | WT |
| BC-173 | WT | F | 81 | 2.5 | HLIUC | G3 | TaN0M0  | No  | NA | WT |
| BC-174 | WT | M | 59 | 2.5 | LLIUC | G2 | TaN0M0  | No  | NA | WT |
| BC-175 | WT | M | 70 | 2.3 | LLIUC | G2 | TaN0M0  | No  | NA | WT |
| BC-176 | WT | M | 75 | 1.5 | LMPUC | G1 | TaN0M0  | No  | NA | NA |
| BC-177 | WT | M | 56 | 1.5 | LLIUC | G2 | TaN0M0  | No  | NA | WT |
| BC-178 | WT | F | 63 | 2   | LMPUC | G1 | TaN0M0  | No  | NA | WT |
| BC-179 | WT | M | 62 | 2   | HLIUC | G3 | TaN0M0  | No  | NA | WT |
| BC-180 | WT | M | 73 | 2   | HLIUC | G3 | TaN0M0  | No  | NA | WT |
| BC-181 | WT | M | 46 | 1   | LLIUC | G2 | TaN0M0  | No  | NA | NA |
| BC-182 | WT | M | 60 | NA  | LLIUC | G2 | TaN0M0  | No  | NA | NA |

BC, Urothelial bladder cancer; M, Male; F, Female; NA, Not available; HLIUC, High-level invasive LLIUC, Low-level invasive urothelial carcinoma; HLIUC, High-level non-invasive urothelial carcinoma; LLNIUC, Low-level non-invasive urothelial carcinoma; LMPIUC, Low malignant potential of invasive urothelial carcinoma; LMPNIUC, Low malignant potential of non-invasive urothelial carcinoma; TIS, Tumor in situ; PDA, Poorly differentiated adenocarcinoma; MDA, Middle differentiated adenocarcinoma. LNM, lymph node metastasis.

**Supplementary Table S2. TERT promoter mutations and TERT mRNA detected in urine samples from patients with UBC.**

| Case number | Gender M / F | Age at diagnosis (year) | Tumor size (CM) | TNM stage | Tumor tissue | TERT promoter mutation         |           |                                 |
|-------------|--------------|-------------------------|-----------------|-----------|--------------|--------------------------------|-----------|---------------------------------|
|             |              |                         |                 |           |              | Pre-operative urine Sequencing | TERT mRNA | Post-operative urine Sequencing |
| BC-1        | M            | 68                      | 7,3             | T1N0M0    | C228T        | WT                             | NA        | NA                              |
| BC-2        | M            | 70                      | 2               | T1N0M0    | C228T        | C228T                          | NA        | NA                              |
| BC-3        | M            | 64                      | 4               | T1N0M0    | C228T        | C228T                          | 15,47     | NA                              |
| BC-4        | M            | 60                      | 2               | T1N0M0    | C228T        | C228T                          | 0,034     | NA                              |
| BC-5        | M            | 71                      | 3,2             | T1N0M0    | C228T        | C228T                          | NA        | NA                              |
| BC-6        | M            | 55                      | 8,1             | T1N0M0    | C228T        | C228T                          | Negative  | WT                              |
| BC-7        | M            | 74                      | 3,8             | T1N0M0    | C228T        | C228T                          | 1,65      | WT                              |
| BC-8        | M            | 56                      | 3,7             | T1N0M0    | C228T        | C228T                          | 0,112     | WT                              |
| BC-9        | M            | 57                      | 2,1             | T1N0M0    | C228T        | C228T                          | 0,168     | WT                              |
| BC-10       | M            | 73                      | 1,5             | T1N0M0    | C228T        | C228T                          | NA        | NA                              |
| BC-11       | M            | 69                      | 4               | T2bN0M0   | C228T        | C228T                          | 0,996     | C228T                           |
| BC-12       | M            | 68                      | 3               | T2bN0M0   | C228T        | C228T                          | 0,328     | C228T                           |
| BC-13       | F            | 65                      | 2               | T3aN0M0   | C228T        | C228T                          | 0,063     | NA                              |
| BC-14       | M            | 51                      | 2,7             | T3bN2M0   | C228T        | C228T                          | 0,198     | NA                              |
| BC-15       | M            | 75                      | 1,5             | TaN0M0    | C228T        | C228T                          | 0,223     | WT                              |
| BC-16       | M            | 66                      | 5               | TaN0M0    | C228T        | C228T                          | NA        | NA                              |
| BC-17       | M            | 70                      | 3               | TaN0M0    | C228T        | C228T                          | NA        | NA                              |
| BC-18       | M            | 79                      | 1,5             | TaN0M0    | C228T        | C228T                          | NA        | C228T                           |
| BC-19       | M            | 63                      | 1,5             | TaN0M0    | WT           | C228T                          | NA        | WT                              |
| BC-20       | F            | 60                      | 1,9             | TaN0M0    | C228T        | C228T                          | 7,825     | WT                              |
| BC-21       | F            | 70                      | 3               | TaN0M0    | C228T        | C228T                          | NA        | NA                              |
| BC-22       | M            | 51                      | 2,6             | TaN0M0    | WT           | C228T                          | 1,065     | NA                              |
| BC-23       | M            | 79                      | 2,1             | T1N0M0    | WT           | C250T                          | 0,142     | NA                              |
| BC-24       | M            | 58                      | 4               | T3aN0M0   | C250T        | C250T                          | 0,061     | WT                              |
| BC-25       | M            | 41                      | 2,3             | T4aN0M0   | C250T        | C250T                          | NA        | NA                              |
| BC-26       | M            | 50                      | 3               | TaN0M0    | C228A        | C228A                          | 0,089     | NA                              |
| BC-27       | M            | 47                      | 4               | T1N0M0    | C242T        | C242T                          | 0,283     | NA                              |
| BC-28       | M            | 59                      | 7               | T3aN0M0   | C228T        | WT                             | 0,081     | NA                              |
| BC-29       | M            | 73                      | 0,5             | TaN0M0    | WT           | WT                             | NA        | NA                              |
| BC-30       | M            | 60                      | 2,3             | TisN0M0   | WT           | WT                             | 0,041     | NA                              |
| BC-31       | M            | 53                      | NA              | T1N0M0    | WT           | WT                             | NA        | NA                              |
| BC-32       | M            | 65                      | 1               | T1N0M0    | C250T        | WT                             | 0,47      | NA                              |
| BC-33       | F            | 70                      | 3,3             | T3aN0M0   | C228T        | WT                             | NA        | NA                              |
| BC-34       | M            | 79                      | 5               | T4aN1M0   | WT           | WT                             | NA        | NA                              |
| BC-35       | M            | 82                      | 1,5             | TaN0M0    | C228T        | WT                             | 1,93      | NA                              |
| BC-36       | M            | 64                      | 0,5             | TaN0M0    | C228T        | WT                             | NA        | WT                              |
| BC-37       | M            | 61                      | 3               | TaN0M0    | WT           | WT                             | NA        | NA                              |
| BC-38       | M            | 61                      | 3               | TaN0M0    | WT           | WT                             | 0,458     | WT                              |
| BC-39       | M            | 63                      | 2,8             | TaN0M0    | WT           | WT                             | NA        | NA                              |
| BC-40       | M            | 44                      | 1               | TaN0M0    | C228T        | WT                             | 0,094     | NA                              |
| BC-41       | F            | 79                      | 1               | TaN0M0    | WT           | WT                             | Negative  | NA                              |
| BC-42       | M            | 59                      | NA              | TisN0M0   | C228T        | WT                             | 1,262     | WT                              |

|       |   |    |     |         |       |    |       |    |
|-------|---|----|-----|---------|-------|----|-------|----|
| BC-43 | M | 71 | NA  | T1N0M0  | WT    | WT | 0,494 | NA |
| BC-44 | M | 66 | 4,3 | T1N0M0  | WT    | WT | 0,913 | WT |
| BC-45 | M | 61 | 3,4 | T1N0M0  | WT    | WT | NA    | NA |
| BC-46 | M | 57 | 2,8 | T1N0M0  | WT    | WT | 0,045 | NA |
| BC-47 | F | 43 | 4   | T1N0M0  | WT    | WT | 1,665 | WT |
| BC-48 | M | 79 | 3   | T1N0M0  | WT    | WT | NA    | NA |
| BC-49 | M | 61 | 1   | T1N0M0  | WT    | WT | 0,144 | WT |
| BC-50 | M | 89 | NA  | T1N0M0  | C228T | WT | NA    | NA |
| BC-51 | M | 63 | NA  | T1N0M0  | C228T | WT | NA    | NA |
| BC-52 | M | 62 | 8,1 | T1N0M0  | WT    | WT | NA    | NA |
| BC-53 | M | 52 | 4,8 | T1N0M0  | C250T | WT | NA    | NA |
| BC-54 | M | 71 | 2,5 | T1N0M0  | C228T | WT | 0,034 | WT |
| BC-55 | M | 71 | 1,5 | T1N0M0  | C228T | WT | 0,03  | NA |
| BC-56 | M | 81 | 1,5 | T1N0M0  | WT    | WT | 0,066 | WT |
| BC-57 | M | 73 | 4   | T1N0M0  | WT    | WT | 0,114 | NA |
| BC-58 | F | 70 | 3   | T1N0M0  | WT    | WT | NA    | NA |
| BC-59 | M | 70 | 3   | T1N0M0  | WT    | WT | 0,893 | NA |
| BC-60 | F | 72 | 5,5 | T1N0M0  | WT    | WT | NA    | NA |
| BC-61 | M | 70 | 4   | T1N0M0  | WT    | WT | NA    | WT |
| BC-62 | M | 69 | 3,6 | T2aN0M0 | WT    | WT | 0,037 | NA |
| BC-63 | M | 53 | 7   | T2aN0M0 | C228T | WT | 0,213 | NA |
| BC-64 | M | 74 | 4   | T2bN0M0 | WT    | WT | NA    | NA |
| BC-65 | F | 75 | 5   | T2bN0M0 | WT    | WT | NA    | NA |
| BC-66 | F | 57 | 2   | T2bN0M0 | WT    | WT | NA    | NA |
| BC-67 | F | 70 | 8   | T3aN0M0 | WT    | WT | 0,504 | NA |
| BC-68 | M | 66 | 6   | T3aN0M0 | WT    | WT | 0,235 | WT |
| BC-69 | M | 59 | 5   | T3aN0M0 | C228T | WT | NA    | NA |
| BC-70 | F | 54 | 4   | T3aN2M0 | WT    | WT | 0,33  | WT |
| BC-71 | M | 60 | 8,2 | T3bN0M0 | WT    | WT | 0,046 | WT |
| BC-72 | M | 63 | 11  | T4aN0M0 | WT    | WT | NA    | NA |
| BC-73 | M | 65 | NA  | T4N0M0  | WT    | WT | 0,09  | WT |
| BC-74 | M | 76 | NA  | TaN0M0  | WT    | WT | NA    | WT |
| BC-75 | M | 50 | 0,8 | TaN0M0  | WT    | WT | NA    | WT |
| BC-76 | M | 66 | 2   | TaN0M0  | WT    | WT | 0,037 | WT |
| BC-77 | M | 47 | 2,5 | TaN0M0  | C228T | WT | NA    | NA |
| BC-78 | M | 82 | 2,5 | TaN0M0  | WT    | WT | NA    | NA |
| BC-79 | F | 56 | 2,3 | TaN0M0  | WT    | WT | NA    | NA |
| BC-80 | M | 74 | 1,5 | TaN0M0  | WT    | WT | NA    | NA |
| BC-81 | M | 86 | 1,5 | TaN0M0  | WT    | WT | NA    | NA |
| BC-82 | M | 75 | 1,2 | TaN0M0  | WT    | WT | NA    | NA |
| BC-83 | M | 44 | 0,8 | TaN0M0  | WT    | WT | NA    | NA |
| BC-84 | M | 46 | 4   | TaN0M0  | WT    | WT | NA    | NA |
| BC-85 | M | 78 | 3   | TaN0M0  | C228T | WT | NA    | NA |
| BC-86 | M | 62 | 3   | TaN0M0  | WT    | WT | NA    | NA |
| BC-87 | M | 87 | 3   | TaN0M0  | WT    | WT | NA    | NA |
| BC-88 | M | 63 | 2   | TaN0M0  | C228T | WT | NA    | NA |
| BC-89 | F | 78 | 6,5 | TaN0M0  | WT    | WT | 0,078 | WT |

|        |   |    |     |        |       |       |          |    |
|--------|---|----|-----|--------|-------|-------|----------|----|
| BC-90  | M | 48 | 4,1 | TaN0M0 | WT    | WT    | NA       | NA |
| BC-91  | F | 83 | 3,1 | TaN0M0 | WT    | WT    | Negative | WT |
| BC-92  | M | 60 | 2,7 | TaN0M0 | C228T | WT    | 0,621    | WT |
| BC-93  | M | 73 | 2   | TaN0M0 | WT    | WT    | 4,042    | NA |
| BC-94  | M | 60 | 2   | TaN0M0 | WT    | WT    | NA       | NA |
| BC-95  | M | 75 | 1   | TaN0M0 | WT    | WT    | NA       | NA |
| BC-96  | M | 48 | 3,2 | TaN0M0 | WT    | WT    | NA       | WT |
| BC-97  | M | 67 | 2,1 | TaN0M0 | WT    | WT    | NA       | NA |
| BC-98  | M | 60 | 1,5 | TaN0M0 | WT    | WT    | NA       | WT |
| BC-99  | M | 55 | 2,2 | TaN0M0 | C228T | WT    | NA       | NA |
| BC-100 | M | 45 | 2,7 | TaN0M0 | C228T | WT    | 0,507    | WT |
| BC-101 | M | 73 | 0,8 | TaN0M0 | C250T | C250T | NA       | WT |
| BC-102 | M | 57 | 2   | TaN0M0 | C228T | WT    | NA       | WT |

UBC, Urothelial bladder cancer; M, Male; F, Female; NA, Samples or data not available; WT, Wild-type.
